# Supplementary material for: Real-world clinical evidence of lazertinib use in acquired EGFR T790M mutated non-small cell lung cancer
Source: PubMed Central journal article supplement — Transl Lung Cancer Res. 2023 Aug 22;12(9):1912–22. doi: 10.21037/tlcr-23-160 (PMC10579823; doi:10.21037/tlcr-23-160), 2023-08-22
Supplement: tlcr-12-09-1912-supplementary.pdf [file tlcr-12-09-1912-supplementary.pdf]

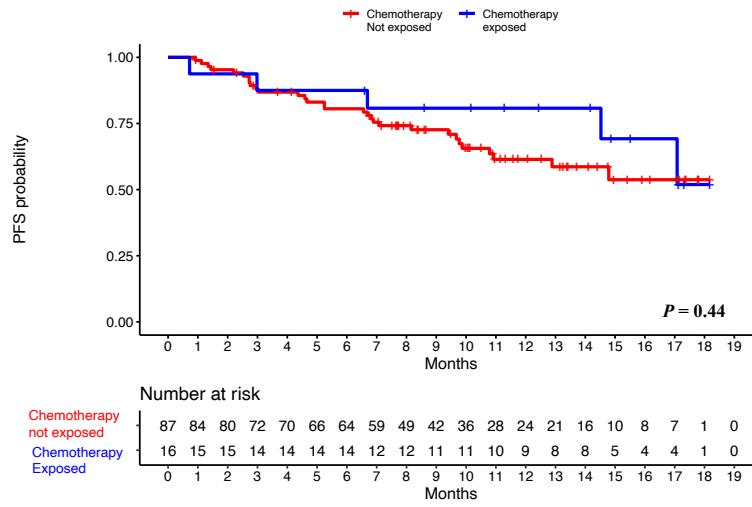

Figure S1 Progression-free survival based on previous chemotherapy history.

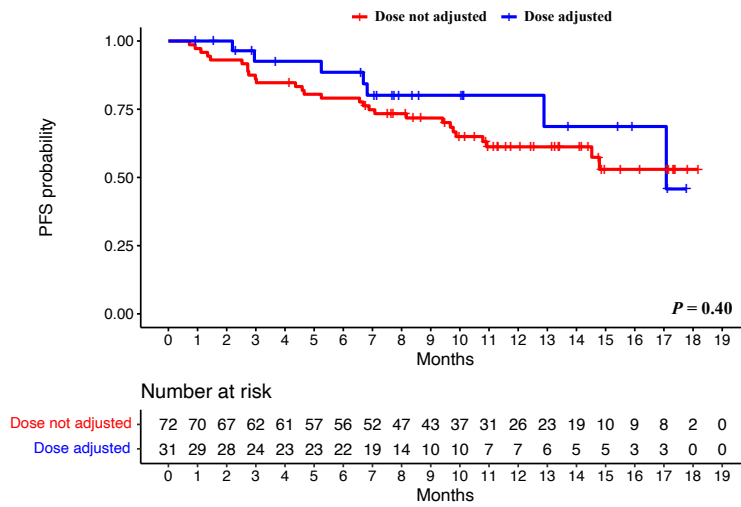

Figure S2 Progression-free survival based on dose-reduction history within 6 months after lazertinib initiation.
